# Supplementary material for: Ejaculate for Microbiological Culture: To Wash or Not To Wash?
Source: PubMed Central journal article supplement (PMC9769719; doi:10.1128/spectrum.03269-22), 2022-11-02
Supplement: reviewer-comments.pdf [file reviewer-comments.pdf]

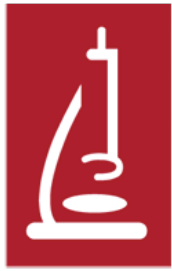

AMERICAN  
SOCIETY FOR  
MICROBIOLOGY

# Microbiology Spectrum

## Ejaculate for microbiological culture: to wash or not to wash?

Tom Theiler, Ioana Diana Olaru, Charlotte Kilzer, Franziska Schuler, and Frieder Schaumburg

*Corresponding Author(s): Ioana Diana Olaru, University Hospital Münster,*

---

### Review Timeline:

|                     |                    |
|---------------------|--------------------|
| Submission Date:    | August 18, 2022    |
| Editorial Decision: | September 26, 2022 |
| Revision Received:  | October 7, 2022    |
| Accepted:           | October 17, 2022   |

---

*Editor: William Lainhart*

*Reviewer(s): The reviewers have opted to remain anonymous.*

### Transaction Report:

(Note: With the exception of the correction of typographical or spelling errors that could be a source of ambiguity, letters and reports are not edited. The original formatting of letters and referee reports may not be reflected in this compilation.)

**DOI:** <https://doi.org/10.1128/spectrum.03269-22>

September 26, 2022

Dr. Ioana Diana Olaru  
University Hospital Münster,  
Institute of Medical Microbiology  
Domagkstr 10  
Münster 48149  
Germany

Re: Spectrum03269-22 (Ejaculate for microbiological culture: to wash or not to wash?)

Dear Dr. Ioana Diana Olaru:

Thank you for submitting your manuscript to Microbiology Spectrum. When submitting the revised version of your paper, please provide (1) point-by-point responses to the issues raised by the reviewers as file type "Response to Reviewers," not in your cover letter, and (2) a PDF file that indicates the changes from the original submission (by highlighting or underlining the changes) as file type "Marked Up Manuscript - For Review Only". Please use this link to submit your revised manuscript - we strongly recommend that you submit your paper within the next 60 days or reach out to me. Detailed instructions on submitting your revised paper are below.

Link Not Available

Below you will find instructions from the Microbiology Spectrum editorial office and comments generated during the review.

ASM policy requires that data be available to the public upon online posting of the article, so please verify all links to sequence records, if present, and make sure that each number retrieves the full record of the data. If a new accession number is not linked or a link is broken, provide production staff with the correct URL for the record. If the accession numbers for new data are not publicly accessible before the expected online posting of the article, publication of your article may be delayed; please contact the ASM production staff immediately with the expected release date.

The ASM Journals program strives for constant improvement in our submission and publication process. Please tell us how we can improve your experience by taking this quick [Author Survey](#).

Sincerely,

William Lainhart

Editor, Microbiology Spectrum

Journals Department  
American Society for Microbiology  
1752 N St., NW  
Washington, DC 20036  
E-mail: [spectrum@asmusa.org](mailto:spectrum@asmusa.org)

Reviewer comments:

Reviewer #1 (Comments for the Author):

The authors describe a study in which bacterial recovery was compared in washed and unwashed ejaculate specimens. The authors conclude that there should not be a washing step. The data in Table 1 support this conclusion. The following are suggestions for strengthening the manuscript:

1. Table 1 displays the median CFU/mL of each culture, but what was the mean? Consider displaying this data in the supplement.
2. Were these the only bacterial groups that were recovered? Were there coryneform, Neisseria, or Staphylococcus aureus? What about oxidase-positive GNRs? Could there be an "other" grouping?

3. Can the types of anaerobes encountered be defined?
4. Was there more than one grouping of bacteria per sample? Perhaps create a pie chart with the number of bacterial groupings per sample.
5. In table 1, remove N=186 from the first column.
6. Consider "method evaluation" instead of "test evaluation" as a keyword.
7. Line 16: spell out Zinc the first time Zn is used
8. Line 17: suggest rephrasing to " might impair growth of bacteria in culture."
9. Line 25: MALDI-TOF should have "mass spectrometry" after it
10. Gram should be capitalized throughout
11. Line 75: Remove sentence that begins with "The center..."
12. Line 112: spell out Chi square test
13. Line 148, 149: spp. should not be italicized

Reviewer #2 (Comments for the Author):

In the manuscript by Theiler et al, the authors evaluated if washing ejaculate specimens with saline (test) prior to culture would improve recovery of bacteria relative to unwashed specimens (control). Overall, the number of positive cultures was significantly lower in the test group and lower colony counts were observed, relative to the control group.

- A. On lines 17, 19 and 140, consider changing "cultural" to "culture".
- B. In the Material and Methods, how was the 10 uL of specimen plated? Was it pipetted or was a calibrated loop used?
- C. Were the control specimens plated prior to the test specimens or were the controls sitting at room temperature? How much of a time difference and could this account for lower yields?
- D. On lines 124-125 it states "Most samples were positive for CNS, followed by viridans streptococci, Enterococcus spp and anaerobes" Please clarify what "most samples" means.

Staff Comments:

**Preparing Revision Guidelines**

To submit your modified manuscript, log onto the eJP submission site at <https://spectrum.msubmit.net/cgi-bin/main.plex>. Go to Author Tasks and click the appropriate manuscript title to begin the revision process. The information that you entered when you first submitted the paper will be displayed. Please update the information as necessary. Here are a few examples of required updates that authors must address:

- Point-by-point responses to the issues raised by the reviewers in a file named "Response to Reviewers," NOT IN YOUR COVER LETTER.
- Upload a compare copy of the manuscript (without figures) as a "Marked-Up Manuscript" file.
- Each figure must be uploaded as a separate file, and any multipanel figures must be assembled into one file.
- Manuscript: A .DOC version of the revised manuscript
- Figures: Editable, high-resolution, individual figure files are required at revision, TIFF or EPS files are preferred

For complete guidelines on revision requirements, please see the journal Submission and Review Process requirements at <https://journals.asm.org/journal/Spectrum/submission-review-process>. **Submissions of a paper that does not conform to Microbiology Spectrum guidelines will delay acceptance of your manuscript. "**

Please return the manuscript within 60 days; if you cannot complete the modification within this time period, please contact me. If you do not wish to modify the manuscript and prefer to submit it to another journal, please notify me of your decision immediately so that the manuscript may be formally withdrawn from consideration by Microbiology Spectrum.

If your manuscript is accepted for publication, you will be contacted separately about payment when the proofs are issued; please follow the instructions in that e-mail. Arrangements for payment must be made before your article is published. For a complete list of **Publication Fees**, including supplemental material costs, please visit our [website](#).

Corresponding authors may [join or renew ASM membership](#) to obtain discounts on publication fees. Need to upgrade your membership level? Please contact Customer Service at [Service@asmusa.org](mailto:Service@asmusa.org).

Thank you for submitting your paper to Microbiology Spectrum.

October 7th, 2022

Dear Editor,

Thank you for considering our manuscript for publication and for sending comments from peer reviewers. Please find below a detailed response to the editorial comments and reviewers' comments.

## REVIEWER 1

### Comment 1

Table 1 displays the median CFU/mL of each culture, but what was the mean? Consider displaying this data in the supplement.

#### Response to comment 1

Thank you for your comment. We felt that the median would provide a better representation of the distribution of the data given that data are not normally distributed. We have added a table below with mean CFUs to show that the results and interpretation would not change.

|                                     | No washing<br>(Control arm)<br>Mean CFU ( $\times 10^3$ /ml SD) | Washing prior culture<br>(Test arm)<br>Mean CFU ( $\times 10^3$ /ml SD) |
|-------------------------------------|-----------------------------------------------------------------|-------------------------------------------------------------------------|
| Culture positive samples            | 32.8 (106.9)                                                    | 28.4 (110.2)                                                            |
| Gram-negative rods                  | 46.1 (176.0)                                                    | 44.7 (186.0)                                                            |
| Anaerobes                           | 18.3 (28.7)                                                     | 31.5 (67.0)                                                             |
| <i>Enterococcus</i> spp.            | 15.4 (23.8)                                                     | 11.9 (26.4)                                                             |
| Coagulase-negative<br>staphylococci | 3.5 (12.8)                                                      | 4.3 (11.6)                                                              |
| Viridans streptococci               | 8.8 (19.0)                                                      | 7.4 (19.7)                                                              |

### Comment 2

Were these the only bacterial groups that were recovered? Were there coryneform, *Neisseria*, or *Staphylococcus aureus*? What about oxidase-positive GNRs? Could there be an "other" grouping?

#### Response to comment 2

Only bacteria (or groups) that were present in at least 30 samples were reported separately for the purpose of this comparison. In samples which did not undergo washing, we identified 10 samples with *Corynebacterium* spp., 1 with *S. aureus*, 1 with *P. aeruginosa* and 1 with *Neisseria* spp. (other than *N. gonorrhoea*). In samples with washing, we identified 7 samples with *Corynebacterium* spp, 1 with *S. aureus*, and 1 with *P. aeruginosa*.

### Comment 3

Can the types of anaerobes encountered be defined?

#### Response to comment 3

We identified the following anaerobes: *Peptoniphilus*, *Actinomyces*, *Peptoniphilus*, *Veillonella*, *Bacteroides*, *Granulicatella*, *Anaerococcus*, *Fusobacterium*, *Fingoldia*,

*Cutibacterium*, *Peptostreptococcus*, *Actinobaculum*, *Prevotella*, *Alloscardovia*. The information was added in the Table footnote.

**Comment 4**

Was there more than one grouping of bacteria per sample? Perhaps create a pie chart with the number of bacterial groupings per sample.

**Response to comment 4**

Yes, samples frequently had growth of multiple groups. A graph displaying the number of organism groups using the two methods was added to the manuscript (Figure 1).

**Comment 5**

In table 1, remove N=186 from the first column.

**Response to comment 5**

N=186 was removed from the first column.

**Comment 6**

Consider "method evaluation" instead of "test evaluation" as a keyword.

**Response to comment 6**

The change was made as advised.

**Comment 7**

Line 16: spell out Zinc the first time Zn is used

**Response to comment 7**

Changed as suggested.

**Comment 8**

Line 17: suggest rephrasing to "might impair growth of bacteria in culture."

**Response to comment 8**

The sentence was rephrased.

**Comment 9**

Line 25: MALDI-TOF should have "mass spectrometry" after it

**Response to comment 9**

Changed as suggested.

**Comment 10**

Gram should be capitalized throughout

**Response to comment 10**

The changes were made as advised.

**Comment 11**

Line 75: Remove sentence that begins with "The center..."

**Response to comment 11**

The sentence was removed.

**Comment 12**

Line 112: spell out Chi square test

**Response to comment 12**

Changed as suggested.

**Comment 13**

Line 148, 149: spp. should not be italicized

**Response to comment 13**

The changes were made as advised.

**REVIEWER 2****Comment 1**

On lines 17, 19 and 140, consider changing "cultural" to "culture".

**Response to comment 1**

The sentence was rephrased to "might impair growth of bacteria in culture."

**Comment 2**

In the Material and Methods, how was the 10 uL of specimen plated? Was it pipetted or was a calibrated loop used?

**Response to comment 2**

A 10 µL calibrated loop was used. The information was added in the methods section.

**Comment 3**

Were the control specimens plated prior to the test specimens or were the controls sitting at room temperature? How much of a time difference and could this account for lower yields?

**Response to comment 3**

The test plates were inoculated immediately after the control plates. In rare cases this was not possible and the sample was cooled to 2-8 degrees until plating. The washing process usually lasted for less than 10 minutes and therefore this is unlikely to have contributed to the lower yield.

**Comment 4**

On lines 124-125 it states "Most samples were positive for CNS, followed by viridans streptococci, Enterococcus spp. and anaerobes" Please clarify what "most samples" means.

**Response to comment 4**

The sentence was clarified: "*Samples were positive for CNS (59.1%, control arm vs. 44.6%, test arm), followed by viridans streptococci (53.8%, control arm vs. 41.9%, test arm), Enterococcus spp. (25.3%, control arm vs. 23.1%, test arm) and anaerobes (19.9%, control arm vs. 17.2%, test arm) (Table 1).*"

We are very grateful to the reviewers for the feedback provided for improving this manuscript. In the hope that we have responded to the comments satisfactorily,

Yours sincerely,

Ioana D Olaru

October 17, 2022

Dr. Ioana Diana Olaru  
University Hospital Münster,  
Institute of Medical Microbiology  
Domagkstr 10  
Münster 48149  
Germany

Re: Spectrum03269-22R1 (Ejaculate for microbiological culture: to wash or not to wash?)

Dear Dr. Ioana Diana Olaru:

Your manuscript has been accepted, and I am forwarding it to the ASM Journals Department for publication. You will be notified when your proofs are ready to be viewed.

The ASM Journals program strives for constant improvement in our submission and publication process. Please tell us how we can improve your experience by taking this quick [Author Survey](#).

As an open-access publication, Spectrum receives no financial support from paid subscriptions and depends on authors' prompt payment of publication fees as soon as their articles are accepted. You will be contacted separately about payment when the proofs are issued; please follow the instructions in that e-mail. Arrangements for payment must be made before your article is published. For a complete list of **Publication Fees**, including supplemental material costs, please visit our [website](#).

ASM policy requires that data be available to the public upon online posting of the article, so please verify all links to sequence records, if present, and make sure that each number retrieves the full record of the data. If a new accession number is not linked or a link is broken, provide production staff with the correct URL for the record. If the accession numbers for new data are not publicly accessible before the expected online posting of the article, publication of your article may be delayed; please contact the ASM production staff immediately with the expected release date.

Corresponding authors may [join or renew ASM membership](#) to obtain discounts on publication fees. Need to upgrade your membership level? Please contact Customer Service at [Service@asmusa.org](mailto:Service@asmusa.org).

Thank you for submitting your paper to Spectrum.

Sincerely,

William Lainhart  
Editor, Microbiology Spectrum

Journals Department  
American Society for Microbiology  
1752 N St., NW  
Washington, DC 20036  
E-mail: [spectrum@asmusa.org](mailto:spectrum@asmusa.org)
